# Supplementary material for: Updated Taxonomy of Pectobacterium genus in the CIRM-CFBP Bacterial Collection: When Newly Described Species Reveal “Old” Endemic Population
Source: Preprints.org preprint supplement (doi:10.20944/preprints202008.0608.v1), 2020-08-27
Supplement: Supplementary file 1 [file Table S1 - 23 Juillet.xlsx]

## Sheet: legend
Table S1: detailed list of the studied strains, including genome accession numbers when available and accession numbers of dnaX, leuS and recA sequences used for the phylogenetic trees displayed in Figure 1 and Figure S1. The star after the NCBI accession number indicates sequences produced for this study.

## Sheet: Table S1
											NCBI accession numbers of sequences of housekeeping genes
Strain name	Names in other collections	Other names	Received as	Type strain	Isolation host	Isolation year	Entry in collection	Isolation country	Updated taxonomy	Biosample accession	dnaX	leuS	recA	Source of dnaX-leuS-recA sequences
CFBP 1118			Pectobacterium sp.		Brassica oleracea var. botrytis Erfurt	1967	1967	France	P. versatile	SAMN15375019*	MK516888	MK517032	MK517176	Portier et al., 2019
CFBP 1285			Pectobacterium sp.		Cyclamen sp.		1970	Greece	P. carotovorum		MT683909	MT684056	MT684203	This study
CFBP 1286			Pectobacterium sp.		Cyclamen sp.		1970	Greece	P. carotovorum		MT683910	MT684057	MT684204	This study
CFBP 1329			Pectobacterium atrosepticum		Solanum tuberosum		1972	United Kingdom	P. atrosepticum		MT683911	MT684058	MT684205	This study
CFBP 1330			Pectobacterium atrosepticum		Solanum tuberosum		1972	United Kingdom	P. atrosepticum		MT683912	MT684059	MT684206	This study
CFBP 1331			Pectobacterium atrosepticum		Solanum tuberosum		1972	United Kingdom	P. versatile		MK516889	MK517033	MK517177	Portier et al., 2019
CFBP 1332			Pectobacterium atrosepticum		Solanum tuberosum		1972	United Kingdom	P. atrosepticum		MT683913	MT684060	MT684207	This study
CFBP 1333			Pectobacterium atrosepticum		Solanum tuberosum		1972	United Kingdom	P. versatile		MK516890	MK517034	MK517178	Portier et al., 2019
CFBP 1334			Pectobacterium atrosepticum		Solanum tuberosum		1972	United Kingdom	P. atrosepticum		MT683914	MT684061	MT684208	This study
CFBP 1335			Pectobacterium atrosepticum		Solanum tuberosum		1972	United Kingdom	P. atrosepticum		MT683915	MT684062	MT684209	This study
CFBP 1336			Pectobacterium sp.		Solanum tuberosum		1972	United Kingdom	P. versatile		MK516891	MK517035	MK517179	Portier et al., 2019
CFBP 1338			Pectobacterium sp.		Solanum tuberosum		1972	United Kingdom	P. parmentieri		MT683916	MT684063	MT684210	This study
CFBP 1339			Pectobacterium sp.		Solanum tuberosum		1972	United Kingdom	P. versatile		MK516892	MK517036	MK517180	Portier et al., 2019
CFBP 1340			Pectobacterium sp.		Solanum tuberosum		1972	United Kingdom	P. versatile		MK516893	MK517037	MK517181	Portier et al., 2019
CFBP 1341			Pectobacterium sp.		Solanum tuberosum		1972	United Kingdom	P. versatile		MK516894	MK517038	MK517182	Portier et al., 2019
CFBP 1342			Pectobacterium sp.		Solanum tuberosum		1972	United Kingdom	P. parmentieri		MT683917	MT684064	MT684211	This study
CFBP 1349			Pectobacterium sp.		Solanum tuberosum		1972	Italy	P. atrosepticum		MT683918	MT684065	MT684212	This study
CFBP 1350			Pectobacterium carotovorum subsp. carotovorum		Cucurbita pepo		1972	Italy	P. brasiliense		MT683919	MT684066	MT684213	This study
CFBP 1351			Pectobacterium sp.		Hyacinthus orientalis		1972	Netherlands	P. versatile		MK516895	MK517039	MK517183	Portier et al., 2019
CFBP 1356			Pectobacterium sp.		Chrysanthemum morifolium	1971	1972	France	P. brasiliense		MT683920	MT684067	MT684214	This study
CFBP 1357			Pectobacterium sp.		Zantedeschia sp.	1964	1972	France	P. zantedeschiae		MT683921	MT684068	MT684215	This study
CFBP 1363			Pectobacterium sp.		Cyclamen persicum	1972	1972	France	P. carotovorum		MT683922	MT684069	MT684216	This study
CFBP 1364			Pectobacterium sp.		Cyclamen persicum	1972	1972	France	P. carotovorum		MK516896	MK517040	MK517184	Portier et al., 2019
CFBP 1400			Pectobacterium sp.		Brassica oleracea		1972	Yugoslavia	P. carotovorum		MT683923	MT684070	MT684217	This study
CFBP 1401	NCPPB 2384		Pectobacterium sp.		Aloe arborescens		1972	Yugoslavia	P. carotovorum		MT683924	MT684071	MT684218	This study
CFBP 1402			Pectobacterium sp.		Capsicum annuum		1972	Yugoslavia	P. carotovorum	SAMN15374874*	MK516897	MK517041	MK517185	Portier et al., 2019
CFBP 1403	NCPPB 2381		Pectobacterium sp.		Helianthus annuus	1969	1972	Yugoslavia	P. parvum		MK516898	MK517042	MK517186	Portier et al., 2019
CFBP 1453			Pectobacterium atrosepticum		Lycopersicon esculentum	1973	1973	France	P. atrosepticum
CFBP 1454		Dickey R.S. 14	Pectobacterium sp.		Iris sp.	1946	1973	USA	P. versatile		MK516899	MK517043	MK517187	Portier et al., 2019
CFBP 1457		Dickey R.S. 170	Pectobacterium sp.		Philodendron floridi	1967	1973	USA	P. aroidearum		MT683925	MT684072	MT684219	This study
CFBP 1458			Pectobacterium carotovorum subsp. carotovorum		Chrysanthemum sp.	1971	1973	USA	P. brasiliense		MT683926	MT684073	MT684220	This study
CFBP 1488		Samson R. EII-23	Pectobacterium sp.		Iris sp.	1973	1973	France	P. versatile		MK516900	MK517044	MK517188	Portier et al., 2019
CFBP 1489		Samson R. EII-32	Pectobacterium carotovorum subsp. carotovorum		Chrysanthemum sp.	1971	1973	France	P. versatile		MK516901	MK517045	MK517189	Portier et al., 2019
CFBP 1490		Samson R. EII-22	Pectobacterium sp.		Brassica oleracea	1970	1973	France	P. versatile
CFBP 1491		Samson R. EII-95	Pectobacterium sp.		Zantedeschia sp.	1972	1973	France	P. aroidearum
CFBP 1492		Samson R. EII-94	Pectobacterium sp.		Zantedeschia sp.	1972	1973	France	P. aroidearum		MT683927	MT684074	MT684221	This study
CFBP 1493			Pectobacterium sp.		Daucus carota	1972	1973	France	P. versatile		MK516902	MK517046	MK517190	Portier et al., 2019
CFBP 1494		Samson R. 142-3A	Pectobacterium sp.		Cyclamen persicum	1973	1973	France	P. versatile		MK516903	MK517047	MK517191	Portier et al., 2019
CFBP 1520			Pectobacterium betavasculorum		Helianthus annuus		1974	Mexico	P. betavasculorum		MT683928	MT684075	MT684222	This study
CFBP 1525			Pectobacterium atrosepticum		Solanum tuberosum	1969	1974	USA	P. atrosepticum		MT683929	MT684076	MT684223	This study
CFBP 1526	NCPPB 549, ATCC 33260, CIP 105192, DSM 18077, ICMP 1526, ICPB EA155, LMG 2386	Kelman A. SR55	Pectobacterium atrosepticum	Type strain	Solanum tuberosum	1957	1974	United Kingdom	P. atrosepticum	SAMN02999423	MK516904	MK517048	MK517192	Portier et al., 2019
CFBP 1527		Kelman A. Sr150	Pectobacterium atrosepticum		Solanum tuberosum	1973	1974	USA	P. atrosepticum		MT683930	MT684077	MT684224	This study
CFBP 1539	NCPPB 2795, ATCC 43762, CIP 105193, ICMP 4226, LMG 2466, CFBP 2122	Vitanza B. Ur7	Pectobacterium betavasculorum	Type strain	Beta vulgaris cv. Saccharata	1972	1974	USA	P. betavasculorum	SAMN02999474	MK516905	MK517049	MK517193	Portier et al., 2019
CFBP 1546			Pectobacterium atrosepticum		Lycopersicon esculentum	1973	1974	France	P. atrosepticum		MT683931	MT684078	MT684225	This study
CFBP 1551			Pectobacterium sp.		Cyclamen persicum	1972	1974	France	P. versatile
CFBP 1552			Pectobacterium sp.		Chrysanthemum morifolium	1973	1974	France	P. versatile	SAMN10417479	MK516906	MK517050	MK517194	Portier et al., 2019
CFBP 1878	LMG 5863, CIP 103762, ICMP 11533, NCPPB 3839		Pectobacterium carotovorum subsp. odoriferum	Type strain	Cichorium intybus	1978	1979	France	P. odoriferum	SAMN03010636	MK516907	MK517051	MK517195	Portier et al., 2019
CFBP 1879	LMG 5864		Pectobacterium carotovorum subsp. odoriferum		Cichorium intybus	1979	1979	France	P. odoriferum		MT683932	MT684079	MT684226	This study
CFBP 188			Pectobacterium sp.		Zantedeschia aethiopica	1960	Avant 1972	France	P. zantedeschiae		MT683933	MT684080	MT684227	This study
CFBP 1892	LMG 5866		Pectobacterium carotovorum subsp. odoriferum		Cichorium intybus	1978	1979	France	P. odoriferum		MT683934	MT684081	MT684228	This study
CFBP 194			Pectobacterium sp.		Solanum tuberosum	1963	Avant 1972	Morocco	P. versatile		MK516908	MK517052	MK517196	Portier et al., 2019
CFBP 2046	NCPPB 312, ATCC 15713, CIP 82.83, DSM 30168, HAMBI 1429, ICMP 5702, LMG 2404		Pectobacterium carotovorum subsp. carotovorum	Type strain	Solanum tuberosum	1952	1981	Danemark	P. carotovorum	SAMN02999421	MK516909	MK517053	MK517197	Portier et al., 2019
CFBP 2121	NCPPB 2794, UCPB 162		Pectobacterium betavasculorum		Beta vulgaris cv. Saccharata		1982	USA	P. betavasculorum		MT683935	MT684082	MT684229	This study
CFBP 2122	NCPPB 2795, DSM 18076, UCPB 193, CFBP 1539		Pectobacterium betavasculorum	Type strain	Beta vulgaris cv. Saccharata	1972	1982	USA	P. betavasculorum		MT683936	MT684083	MT684230	This study
CFBP 2136			Pectobacterium carotovorum subsp. carotovorum		Solanum tuberosum	1976	1982	France	P. versatile		MK516910	MK517054	MK517198	Portier et al., 2019
CFBP 2137			Pectobacterium carotovorum subsp. carotovorum		Solanum tuberosum	1976	1982	France	P. versatile		MK516911	MK517055	MK517199	Portier et al., 2019
CFBP 2138			Pectobacterium carotovorum subsp. carotovorum		Solanum tuberosum	1976	1982	France	P. versatile		MK516912	MK517056	MK517200	Portier et al., 2019
CFBP 2139			Pectobacterium carotovorum subsp. carotovorum		Solanum tuberosum	1976	1982	France	P. versatile		MK516913	MK517057	MK517201	Portier et al., 2019
CFBP 2140			Pectobacterium carotovorum subsp. carotovorum		Solanum tuberosum	1976	1982	France	P. versatile		MK516914	MK517058	MK517202	Portier et al., 2019
CFBP 2145			Pectobacterium sp.		Cyclamen persicum	1982	1982	France	P. carotovorum		MT683937	MT684084	MT684231	This study
CFBP 2154			Pectobacterium carotovorum subsp. odoriferum		Cichorium intybus	1982	1983?	France	P. odoriferum		MT683938	MT684085	MT684232	This study
CFBP 2155			Pectobacterium carotovorum subsp. odoriferum		Cichorium intybus	1982	1983?	France	P. odoriferum		MT683939	MT684086	MT684233	This study
CFBP 2282			Pectobacterium carotovorum subsp. odoriferum		Cichorium intybus	1982	1984?	France	P. odoriferum		MT683940	MT684087	MT684234	This study
CFBP 2560			Pectobacterium sp.		Cyclamen sp.	1981	Entre 1986 et 1988	France	P. versatile		MK516915	MK517059	MK517203	Portier et al., 2019
CFBP 2561			Pectobacterium sp.		Primula sp.	1981	Entre 1986 et 1988	France	P. versatile		MK516916	MK517060	MK517204	Portier et al., 2019
CFBP 2571			Pectobacterium sp.		Chrysanthemum sp.	1981	Entre 1986 et 1988	France	P. versatile		MK516917	MK517061	MK517205	Portier et al., 2019
CFBP 2572			Pectobacterium sp.		Cyclamen sp.	1981	Entre 1986 et 1988	France	P. versatile		MK516918	MK517062	MK517206	Portier et al., 2019
CFBP 2573			Pectobacterium sp.		Dieffenbachia sp.	1981	Entre 1986 et 1988	France	P. aroidearum		MT683941	MT684088	MT684235	This study
CFBP 2577			Pectobacterium sp.		Primula sp.	1983	Entre 1986 et 1988	France	P. versatile		MK516919	MK517063	MK517207	Portier et al., 2019
CFBP 2580			Pectobacterium sp.		Cyclamen sp.	1983	Entre 1986 et 1988	France	P. brasiliense		MT683942	MT684089	MT684236	This study
CFBP 2629			Pectobacterium sp.		Cichorium intybus	1978	Entre 1986 et 1988	France	P. odoriferum		MT683943	MT684090	MT684237	This study
CFBP 2634			Pectobacterium sp.		Carica papaya	1986	Entre 1986 et 1988	La Réunion (France)	P. brasiliense		MT683944	MT684091	MT684238	This study
CFBP 3139	NCPPB 1278		Pectobacterium atrosepticum		sol	1962	1992	United Kingdom	P. atrosepticum		MT683945	MT684092	MT684239	This study
CFBP 3216	ICMP 1381		Pectobacterium cacticida		Opuntia phaeacantha		1991	USA	P. betavasculorum		MT683946	MT684093	MT684240	This study
CFBP 3217	ICMP 1382		Pectobacterium cacticida		Carnegiea gigantea	1959	1991	USA	P. cacticida		MT683947	MT684094	MT684241	This study
CFBP 3219	ICMP 7448		Pectobacterium cacticida		Carnegiea gigantea	1966	1991	USA	P. cacticida		MT683948	MT684095	MT684242	This study
CFBP 3221	ICMP 7451		Pectobacterium cacticida		Acanthocereus pentagonus	1971	1991	USA	P. cacticida		MT683949	MT684096	MT684243	This study
CFBP 3222	ICMP 7452		Pectobacterium cacticida		Opuntia fulgida	1958	1991	USA	P. cacticida		MT683950	MT684097	MT684244	This study
CFBP 3223	ICMP 7453		Pectobacterium cacticida		Lemaireocereus thurberi	1966	1991	USA	P. cacticida		MT683951	MT684098	MT684245	This study
CFBP 3230	ICMP 1384		Pectobacterium sp.		Gossypium sp.	1964	1991	USA	P. brasiliense	SAMN15366239*	MT683952	MT684099	MT684246	This study
CFBP 3259			Pectobacterium carotovorum subsp. odoriferum		Allium porrum	1980	1994	France	P. odoriferum		MK516920	MK517064	MK517208	Portier et al., 2019
CFBP 3260			Pectobacterium carotovorum subsp. odoriferum		Allium porrum	1980	1994	France	P. odoriferum		MT683953	MT684100	MT684247	This study
CFBP 3261			Pectobacterium carotovorum subsp. odoriferum		Allium porrum	1982	1994	France	P. odoriferum		MT683954	MT684101	MT684248	This study
CFBP 3291	LMG 2398, NCPPB 1449		Pectobacterium betavasculorum		Solanum tuberosum	1968	1992	Romania	P. betavasculorum		MT683955	MT684102	MT684249	This study
CFBP 3292	LMG 2461, NCPPB 2792		Pectobacterium betavasculorum		Beta vulgaris	1974	1992	USA	P. betavasculorum		MT683956	MT684103	MT684250	This study
CFBP 3293	LMG 6668, CFBP 1520		Pectobacterium betavasculorum		Helianthus annuus		1992		P. betavasculorum		MT683957	MT684104	MT684251	This study
CFBP 3294	LMG 6681		Pectobacterium betavasculorum		Beta vulgaris		1992	USA	P. betavasculorum		MT683958	MT684105	MT684252	This study
CFBP 3295	LMG 6682		Pectobacterium betavasculorum		Beta vulgaris		1992	USA	P. betavasculorum		MT683959	MT684106	MT684253	This study
CFBP 3296	LMG 6688, LMG 6734		Pectobacterium betavasculorum		Hyacinthus sp.		1992		P. odoriferum		MT683960	MT684107	MT684254	This study
CFBP 3297	LMG 6734, LMG 6688		Pectobacterium carotovorum subsp. odoriferum		Hyacinthus sp.		1992		P. odoriferum		MK516921	MK517065	MK517209	Portier et al., 2019
CFBP 3304	ICMP 9121, ATCC 43316, CIP 105194, DSM 18074, NCPPB 3701		Pectobacterium wasabiae	Type strain	Eutrema wasabi	1985	1992	Japan	P. wasabiae	SAMN04915576	MK516922	MK517066	MK517210	Portier et al., 2019
CFBP 3305	ICMP 9122		Pectobacterium wasabiae		Eutrema wasabi	1985	1992	Japan	P. wasabiae
CFBP 3306	ICMP 9123		Pectobacterium wasabiae		Eutrema wasabi	1985	1992	Japan	P. wasabiae		MT683961	MT684108	MT684255	This study
CFBP 3307	ICMP 9124		Pectobacterium wasabiae		Eutrema wasabi	1985	1992	Japan	P. wasabiae		MT683962	MT684109	MT684256	This study
CFBP 3308	ICMP 9125		Pectobacterium wasabiae		Eutrema wasabi	1985	1992	Japan	P. wasabiae		MT683963	MT684110	MT684257	This study
CFBP 3628	NCPPB 3849, ATCC 49481, ICMP 11136, DSM 21821		Pectobacterium cacticida	Type strain	Carnegiea gigantea	1944	1995	USA	P. cacticida		MK516923	MK517067	MK517211	Portier et al., 2019
CFBP 4773	CFBP 5373		Pectobacterium atrosepticum		Solanum tuberosum cv. Thalassa	1986	1998	France	P. atrosepticum		MT683964	MT684111	MT684258	This study
CFBP 511			Pectobacterium atrosepticum		Solanum tuberosum cv. Bintje	1964	1964	France	P. atrosepticum					Portier et al., 2019
CFBP 5373	CFBP 4773		Pectobacterium atrosepticum		Solanum tuberosum cv. Thalassa	1986	2000	France	P. atrosepticum		MT683965	MT684112	MT684259	This study
CFBP 5374			Pectobacterium atrosepticum		Solanum tuberosum cv. Chieftain	1994	2000	Canada	P. carotovorum		MT683966	MT684113	MT684260	This study
CFBP 5376			Pectobacterium sp.		Solanum tuberosum cv. Diamant	1995	2000	Algeria	P. carotovorum		MT683967	MT684114	MT684261	This study
CFBP 5377			Pectobacterium sp.		Solanum tuberosum cv. Désirée	1995	2000	Algeria	P. versatile		MK516924	MK517068	MK517212	Portier et al., 2019
CFBP 5378			Pectobacterium sp.		Solanum tuberosum	1995	2000	United Kingdom	P. versatile	SAMN15375090*	MK516925	MK517069	MK517213	Portier et al., 2019
CFBP 5379			Pectobacterium sp.		Solanum tuberosum cv. Diamant	1997	2000	Algeria	P. versatile		MK516926	MK517070	MK517214	Portier et al., 2019
CFBP 5380			Pectobacterium sp.		Solanum tuberosum cv. Diamant	1997	2000	Netherlands	P. sp		MT683968	MT684115	MT684262	This study
CFBP 5381			Pectobacterium sp.		Solanum tuberosum cv. Des	1997	2000	Algeria	P. brasiliense	SAMN15366395*	MT683969	MT684116	MT684263	This study
CFBP 5382			Pectobacterium sp.		Solanum tuberosum cv. Diamant	1997	2000	Netherlands	P. parmentieri		MT683970	MT684117	MT684264	This study
CFBP 5383			Pectobacterium sp.		Solanum tuberosum cv. Timate	2000	2000	Algeria	P. brasiliense		MT683971	MT684118	MT684265	This study
CFBP 5384			Pectobacterium atrosepticum		Solanum tuberosum cv. Désirée	1997	2000	Algeria	P. atrosepticum		MT683972	MT684119	MT684266	This study
CFBP 5385			Pectobacterium atrosepticum		Solanum tuberosum cv. Idole	1997	2000	Algeria	P. atrosepticum		MT683973	MT684120	MT684267	This study
CFBP 5386			Pectobacterium atrosepticum		Solanum tuberosum cv. Désirée	1997	2000	Algeria	P. atrosepticum		MT683974	MT684121	MT684268	This study
CFBP 5387			Pectobacterium sp.		Solanum tuberosum cv. Désirée	1997	2000	Algeria	P. carotovorum		MT683975	MT684122	MT684269	This study
CFBP 5388			Pectobacterium carotovorum subsp. odoriferum		Solanum tuberosum cv. Diamant	1997	2000	Algeria	P. atrosepticum		MT683976	MT684123	MT684270	This study
CFBP 5389			Pectobacterium sp.		Solanum tuberosum cv. Désirée	1997	2000	Algeria	P. brasiliense		MT683977	MT684124	MT684271	This study
CFBP 5390			Pectobacterium sp.		Solanum tuberosum cv. Diamant	1998	2000	Algeria	P. brasiliense		MT683978	MT684125	MT684272	This study
CFBP 5391			Pectobacterium atrosepticum		Solanum tuberosum cv. Désirée	1998	2000	Algeria	P. atrosepticum		MT683979	MT684126	MT684273	This study
CFBP 5392			Pectobacterium sp.		Solanum tuberosum cv. Diamant	1998	2000	Algeria	P. brasiliense		MK516927	MK517071	MK517215	Portier et al., 2019
CFBP 5393			Pectobacterium sp.		Solanum tuberosum cv. Diamant	1999	2000	Algeria	P. carotovorum		MT683980	MT684127	MT684274	This study
CFBP 5394			Pectobacterium atrosepticum		Solanum tuberosum cv. Désirée	1999	2000	Algeria	P. atrosepticum		MT683981	MT684128	MT684275	This study
CFBP 5395			Pectobacterium sp.		Solanum tuberosum cv. Carmine	2000	2000	France	P. atrosepticum		MT683982	MT684129	MT684276	This study
CFBP 5396			Pectobacterium sp.		Solanum tuberosum cv. Timalé	2000	2000	Algeria	P. brasiliense		MT683983	MT684130	MT684277	This study
CFBP 5397			Pectobacterium sp.		Solanum tuberosum cv. Diamant	2000	2000	Algeria	P. brasiliense		MT683984	MT684131	MT684278	This study
CFBP 5398			Pectobacterium sp.		Solanum tuberosum cv. Diamant	2000	2000	Algeria	P. versatile		MK516928	MK517072	MK517216	Portier et al., 2019
CFBP 5531			Pectobacterium betavasculorum		Beta vulgaris var. saccharata	1997	2001	France	P. betavasculorum		MT683985	MT684132	MT684279	This study
CFBP 5532			Pectobacterium betavasculorum		Beta vulgaris var. saccharata	1997	2001	France	P. betavasculorum		MT683986	MT684133	MT684280	This study
CFBP 5533			Pectobacterium betavasculorum		Beta vulgaris var. saccharata	1997	2001	France	P. betavasculorum		MT683987	MT684134	MT684281	This study
CFBP 5534			Pectobacterium betavasculorum		Beta vulgaris var. saccharata	1997	2001	France	P. betavasculorum		MT683988	MT684135	MT684282	This study
CFBP 5535			Pectobacterium betavasculorum		Beta vulgaris var. saccharata	1997	2001	France	P. betavasculorum		MT683989	MT684136	MT684283	This study
CFBP 5536		Samson R. SR650	Pectobacterium betavasculorum		Beta vulgaris var. saccharata	1996	2001	France	P. betavasculorum		MT683990	MT684137	MT684284	This study
CFBP 5537		Samson R. SR563-1554-9	Pectobacterium betavasculorum		Beta vulgaris var. saccharata	1998	2001	France	P. betavasculorum		MT683991	MT684138	MT684285	This study
CFBP 5538		Samson R. SU807-1	Pectobacterium betavasculorum		Beta vulgaris var. saccharata	2000	2001	France	P. betavasculorum		MT683992	MT684139	MT684286	This study
CFBP 5539		Samson R. SU807-3	Pectobacterium carotovorum subsp. odoriferum		Beta vulgaris var. saccharata	2000	2001	France	P. odoriferum		MK516929	MK517073	MK517217	Portier et al., 2019
CFBP 5540		Samson R. SU807-4	Pectobacterium betavasculorum		Beta vulgaris var. saccharata	2000	2001	France	P. betavasculorum		MT683993	MT684140	MT684287	This study
CFBP 5541			Pectobacterium sp.		Cichorium intybus var. sativum cv. Orchies	2001	2001	France	P. versatile		MK516930	MK517074	MK517218	Portier et al., 2019
CFBP 5545		Samson R. ST923-B301	Pectobacterium carotovorum subsp. odoriferum		Cichorium intybus var. foliosum cv. Bea	1999	2001	France	P. odoriferum		MT683994	MT684141	MT684288	This study
CFBP 5547		Samson R. ST923-FO402	Pectobacterium carotovorum subsp. odoriferum		Cichorium intybus var. foliosum cv. Focus	1999	2001	France	P. versatile		MK516931	MK517075	MK517219	Portier et al., 2019
CFBP 5548		Samson R. ST923-P001	Pectobacterium sp.		Cichorium intybus var. foliosum cv. Platine	1999	2001	France	P. versatile		MK516932	MK517076	MK517220	Portier et al., 2019
CFBP 5549		Samson R. ST923-P301	Pectobacterium carotovorum subsp. odoriferum		Cichorium intybus var. foliosum cv. Platine	1999	2001	France	P. odoriferum		MT683995	MT684142	MT684289	This study
CFBP 5663		Shmit J. 40628	Pectobacterium sp.		Iris bulbeux	1983	2001	France	P. versatile	SAMN10417480	MK516933	MK517077	MK517221	Portier et al., 2019
CFBP 5667		Shmit J. 40826	Pectobacterium atrosepticum		Cichorium intybus	1983	2001	France	P. odoriferum		MT683996	MT684143	MT684290	This study
CFBP 5668		Shmit J. 40828	Pectobacterium atrosepticum		Cichorium intybus	1983	2001	France	P. odoriferum		MT683997	MT684144	MT684291	This study
CFBP 5669		Shmit J. 40906	Pectobacterium sp.		Primula obconica	1978	2001	France	P. versatile	SAMN15375390*	MK516934	MK517078	MK517222	Portier et al., 2019
CFBP 5834	CIP 009	Samson R. SL145-CIP009	Pectobacterium sp.		Solanum tuberosum	1977	2001	Peru	P. peruviense		MK516935	MK517079	MK517223	Portier et al., 2019
CFBP 5836		Samson R. SL145-87-7	Pectobacterium atrosepticum		Solanum tuberosum	1987	2001	France	P. atrosepticum		MT683998	MT684145	MT684292	This study
CFBP 5837		Samson R. SL145-1H	Pectobacterium atrosepticum		eau		2001	Spain	P. brasiliense		MT683999	MT684146	MT684293	This study
CFBP 5838		Samson R. SF142-2	Erwinia atroseptica		Cynara scolymus L.	1986	2001	La Réunion (France)	P. versatile		MK516936	MK517080	MK517224	Portier et al., 2019
CFBP 5889			Pectobacterium atrosepticum		Solanum tuberosum cv. Thalassa A	1986	2001	France	P. atrosepticum		MT684000	MT684147	MT684294	This study
CFBP 5890			Pectobacterium sp.		Solanum tuberosum var. Duc	1988	2001	France	P. versatile		MK516937	MK517081	MK517225	Portier et al., 2019
CFBP 5957		Samson EII.219	Pectobacterium atrosepticum		Solanum tuberosum var. Daresa	1975	2001	France	P. atrosepticum		MT684001	MT684148	MT684295	This study
CFBP 5958		Samson EII.234	Pectobacterium atrosepticum		Solanum tuberosum	1976	2001	France	P. atrosepticum		MT684002	MT684149	MT684296	This study
CFBP 5959		Samson EII.316	Pectobacterium atrosepticum		Solanum tuberosum	1977	2001	USA	P. atrosepticum		MT684003	MT684150	MT684297	This study
CFBP 6050	NCPPB 3386, ICMP 9194	De Boer 6	Pectobacterium atrosepticum		Solanum tuberosum		2001	Canada	P. atrosepticum		MT684004	MT684151	MT684298	This study
CFBP 6051	NCPPB 3387, ICMP 9168	De Boer 21	Pectobacterium sp.		Solanum tuberosum		2001	Netherlands	P. versatile	SAMN10417481	MK516938	MK517082	MK517226	Portier et al., 2019
CFBP 6052	NCPPB 3388, ICMP 9181	De Boer 23	Pectobacterium sp.		Solanum tuberosum		2001	Netherlands	P. versatile		MK516939	MK517083	MK517227	Portier et al., 2019
CFBP 6053	NCPPB 3389, ICMP 9171	De Boer 26	Pectobacterium sp.		Solanum tuberosum		2001	Netherlands	P. versatile		MK516940	MK517084	MK517228	Portier et al., 2019
CFBP 6054	NCPPB 3391, ICMP 9179	De Boer 59	Pectobacterium sp.		Solanum tuberosum		2001	Netherlands	P. versatile		MK516941	MK517085	MK517229	Portier et al., 2019
CFBP 6055	NCPPB 3392, ICMP 9176	De Boer 61	Pectobacterium sp.		Solanum tuberosum		2001	Netherlands	P. versatile		MK516942	MK517086	MK517230	Portier et al., 2019
CFBP 6056	NCPPB 3393, ICMP 9174	De Boer 62	Pectobacterium sp.		Solanum tuberosum		2001	Netherlands	P. versatile		MK516943	MK517087	MK517231	Portier et al., 2019
CFBP 6057	NCPPB 3394, ICMP 9175	De Boer 63	Pectobacterium sp.		Solanum tuberosum		2001	Netherlands	P. versatile		MK516944	MK517088	MK517232	Portier et al., 2019
CFBP 6058	NCPPB 3395, ICMP 9180	De Boer 65	Pectobacterium sp.		Solanum tuberosum		2001	Netherlands	P. parvum		MK516945	MK517089	MK517233	Portier et al., 2019
CFBP 6060	NCPPB 3399, ICMP 9177	De Boer 193	Pectobacterium sp.		Solanum tuberosum		2001	Canada	P. versatile		MK516946	MK517090	MK517234	Portier et al., 2019
CFBP 6061	NCPPB 3402, ICMP 9170	De Boer 190	Pectobacterium sp.		Solanum tuberosum		2001	USA	P. versatile		MK516947	MK517091	MK517235	Portier et al., 2019
CFBP 6063	NCPPB 3405, ICMP 9187	De Boer 197	Pectobacterium sp.		Solanum tuberosum		2001	Canada	P. versatile		MK516948	MK517092	MK517236	Portier et al., 2019
CFBP 6064	NCPPB 3407, ICMP 9189	De Boer 207	Pectobacterium sp.		Solanum tuberosum		2001	Canada	P. versatile		MK516949	MK517093	MK517237	Portier et al., 2019
CFBP 6065	NCPPB 3408, ICMP 9190	De Boer 208	Pectobacterium sp.		Solanum tuberosum		2001	Canada	P. carotovorum		MT684005	MT684152	MT684299	This study
CFBP 6066	NCPPB 3409, ICMP 9196		Pectobacterium sp.		Solanum tuberosum		2001	Canada	P. carotovorum		MT684006	MT684153	MT684300	This study
CFBP 6067	NCPPB 3410, ICMP 9191	De Boer 210	Pectobacterium sp.		Solanum tuberosum		2001	USA	P. sp		MT684007	MT684154	MT684301	This study
CFBP 6068	NCPPB 3411, ICMP 9192	De Boer 211	Pectobacterium sp.		Solanum tuberosum		2001	USA	P. sp
CFBP 6069	NCPPB 3412, ICMP 9193	De Boer 360	Pectobacterium sp.		Solanum tuberosum		2001	USA	P. carotovorum		MT684008	MT684155	MT684302	This study
CFBP 6070	NCPPB 3413, ICMP 9195	De Boer 380	Pectobacterium sp.		Solanum tuberosum		2001	USA	P. carotovorum		MT684009	MT684156	MT684303	This study
CFBP 6071	NCPPB 3414, ICMP 9199	De Boer 474	Pectobacterium sp.		Solanum tuberosum		2001	USA	P. carotovorum		MK516950	MK517094	MK517238	Portier et al., 2019
CFBP 6074	NCPPB 3417, ICMP 9197	De Boer 477	Pectobacterium sp.		Solanum tuberosum		2001	USA	P. carotovorum	SAMN15374888*	MT684010	MT684157	MT684304	This study
CFBP 6075	NCPPB 3418, ICMP 9202	De Boer 497	Pectobacterium sp.		Solanum tuberosum		2001	USA	P. versatile		MK516951	MK517095	MK517239	Portier et al., 2019
CFBP 6077	NCPPB 3420, ICMP 9201	De Boer 499	Pectobacterium sp.		Solanum tuberosum		2001	USA	P. carotovorum		MT684011	MT684158	MT684305	This study
CFBP 6078	NCPPB 3421, ICMP 9204	De Boer 500	Pectobacterium sp.		Solanum tuberosum		2001	USA	P. carotovorum		MT684012	MT684159	MT684306	This study
CFBP 6079	NCPPB 3422, ICMP 9206	De Boer 517	Pectobacterium sp.		Solanum tuberosum		2001	USA	P. versatile		MK516952	MK517096	MK517240	Portier et al., 2019
CFBP 6081	NCPPB 3427, ICMP 9183	De Boer 92	Pectobacterium sp.		Solanum tuberosum		2001	Canada	P. carotovorum		MK516953	MK517097	MK517241	Portier et al., 2019
CFBP 6082	NCPPB 3428, ICMP 9194	De Boer 365	Pectobacterium sp.		Solanum tuberosum		2001	USA	P. carotovorum		MT684013	MT684160	MT684307	This study
CFBP 6276			Pectobacterium atrosepticum		Solanum tuberosum var. Felsina	1999	2002	France	P. atrosepticum		MT684014	MT684161	MT684308	This study
CFBP 6588		Gardan L. 11941, GRISP 93.2608	Pectobacterium carotovorum subsp. carotovorum		Musa sp.	1993	2000	Martinique (France)	P. sp		MT684015	MT684162	MT684309	This study
CFBP 6594		Gardan L. 11947, GRISP 90.327	Pectobacterium carotovorum subsp. carotovorum		Musa sp.	1990	2000	Martinique (France)	P. brasiliense		MT684016	MT684163	MT684310	This study
CFBP 6607	ATCC BAA-416 (deleted), IBSBF 1691	Duarte BPBB_8, De Boer S.H. Ecbr_8	“Pectobacterium carotovorum subsp. brasiliensis”		Solanum tuberosum cv. Elvira	1999	2002	Brazil	P. brasiliense		MK516954	MK517098	MK517242	Portier et al., 2019
CFBP 6608		Duarte BPBB_54, De Boer S.H. Ecbr_54	“Pectobacterium carotovorum subsp. brasiliensis”		Solanum tuberosum cv. Baronesa	1999	2002	Brazil	P. brasiliense		MT684017	MT684164	MT684311	This study
CFBP 6609		Duarte BPBB_101, De Boer S.H. Ecbr_101	“Pectobacterium carotovorum subsp. brasiliensis”		Solanum tuberosum cv. Macaca	1999	2002	Brazil	P. brasiliense		MT684018	MT684165	MT684312	This study
CFBP 6610		Duarte BPBB_106, De Boer S.H. Ecbr_106	“Pectobacterium carotovorum subsp. brasiliensis”		Solanum tuberosum cv. Macaca	1999	2002	Brazil	P. brasiliense		MT684019	MT684166	MT684313	This study
CFBP 6611		Duarte BPBB_137, De Boer S.H. Ecbr_137	“Pectobacterium carotovorum subsp. brasiliensis”		Solanum tuberosum cv. Baronesa	1999	2002	Brazil	P. brasiliense		MT684020	MT684167	MT684314	This study
CFBP 6612		Duarte BPBB_138, De Boer S.H. Ecbr_138	“Pectobacterium carotovorum subsp. brasiliensis”		Solanum tuberosum cv. Baronesa	1999	2002	Brazil	P. brasiliense		MT684021	MT684168	MT684315	This study
CFBP 6613		Duarte BPBB_142, De Boer S.H. Ecbr_142	“Pectobacterium carotovorum subsp. brasiliensis”		Solanum tuberosum cv. Baronesa	1999	2002	Brazil	P. brasiliense		MT684022	MT684169	MT684316	This study
CFBP 6614		Duarte BPBB_153, De Boer S.H. Ecbr_153	“Pectobacterium carotovorum subsp. brasiliensis”		Solanum tuberosum cv. Macaca	1999	2002	Brazil	P. brasiliense		MT684023	MT684170	MT684317	This study
CFBP 6615		Duarte BPBB_200, De Boer S.H. Ecbr_200	“Pectobacterium carotovorum subsp. brasiliensis”		Solanum tuberosum cv. Baronesa	1999	2002	Brazil	P. brasiliense		MK516955	MK517099	MK517243	Portier et al., 2019
CFBP 6616		Duarte BPBB_205, De Boer S.H. Ecbr_205	“Pectobacterium carotovorum subsp. brasiliensis”		Solanum tuberosum cv. Macaca	1999	2002	Brazil	P. brasiliense		MT684024	MT684171	MT684318	This study
CFBP 6617	ATCC BAA-417 (deleted), IBSBF 1692	Duarte BPBB_212, De Boer S.H. Ecbr_212	“Pectobacterium carotovorum subsp. brasiliensis”	Type strain	Solanum tuberosum cv. Elvira	1999	2002	Brazil	P. brasiliense	SAMN13779957	MK516956	MK517100	MK517244	Portier et al., 2019
CFBP 6618	ATCC BAA-418 (deleted), IBSBF 1697	Duarte BPBB_213, De Boer S.H. Ecbr_213	“Pectobacterium carotovorum subsp. brasiliensis”		Solanum tuberosum cv. Macaca	1999	2002	Brazil	P. brasiliense		MT684025	MT684172	MT684319	This study
CFBP 6619	ATCC BAA-419 (deleted), IBSBF 1695	Duarte BPBB_371, De Boer S.H. Ecbr_371	“Pectobacterium carotovorum subsp. brasiliensis”		Solanum tuberosum cv. Macaca	1999	2002	Brazil	P. brasiliense		MT684026	MT684173	MT684320	This study
CFBP 6679			Pectobacterium carotovorum subsp. odoriferum		Apium graveolens	1981	2003	France	P. odoriferum		MT684027	MT684174	MT684321	This study
CFBP 6698			Pectobacterium carotovorum		Allium porrum	2000	2003	France	P. versatile	SAMN15375402*	MK516957	MK517101	MK517245	Portier et al., 2019
CFBP 6699			Pectobacterium carotovorum		Allium porrum	2000	2003	France	P. versatile		MK516958	MK517102	MK517246	Portier et al., 2019
CFBP 6702		Samson R. EII288	Pectobacterium carotovorum		Apium graveolens	1976	2003	France	P. carotovorum		MT684028	MT684175	MT684322	This study
CFBP 6725			Pectobacterium carotovorum subsp. carotovorum		Lycopersicon esculentum	2003	2003	Guadeloupe (France)	P. aroidearum		MT684029	MT684176	MT684323	This study
CFBP 7079		CITA Q-1	Pectobacterium carotovorum subsp. carotovorum		eau	2005	2007	Spain	P. brasiliense		MK516959	MK517103	MK517247	Portier et al., 2019
CFBP 7080		CITA AC-1	Pectobacterium carotovorum subsp. carotovorum		eau	2005	2007	Spain	P. versatile		MK516960	MK517104	MK517248	Portier et al., 2019
CFBP 7081		CITA A-8	Pectobacterium carotovorum subsp. carotovorum		eau	2005	2007	Spain	P. carotovorum		MK516961	MK517105	MK517249	Portier et al., 2019
CFBP 7082		CITA A-7	Pectobacterium carotovorum subsp. carotovorum		eau	2005	2007	Spain	P. carotovorum		MT684030	MT684177	MT684324	This study
CFBP 7347		A10.1	Pectobacterium carotovorum subsp. carotovorum		Solanum Tuberosum (Draga)	2003	2010	Syria	P. carotovorum	SAMN15374892*	MT684031	MT684178	MT684325	This study
CFBP 7348		A10.2	Pectobacterium carotovorum subsp. carotovorum		Solanum Tuberosum (Konkret)	2003	2010	Syria	P. carotovorum
CFBP 7349		A16	Pectobacterium carotovorum subsp. carotovorum		Solanum Tuberosum (Lezita)	2003	2010	Syria	P. carotovorum
CFBP 7350		A18	Pectobacterium carotovorum subsp. carotovorum		Solanum Tuberosum	2003	2010	Syria	P. carotovorum		MT684032	MT684179	MT684326	This study
CFBP 7351		N78	Pectobacterium carotovorum subsp. carotovorum		Solanum Tuberosum, stem	2004	2010	Syria	P. carotovorum		MK516962	MK517106	MK517250	Portier et al., 2019
CFBP 7352		C3	Pectobacterium carotovorum subsp. carotovorum		Solanum Tuberosum	2004	2010	Syria	P. carotovorum		MT684033	MT684180	MT684327	This study
CFBP 7353		C140.2	Pectobacterium carotovorum subsp. carotovorum		Solanum Tuberosum	2004	2010	Syria	P. carotovorum		MT684034	MT684181	MT684328	This study
CFBP 7354		C338	Pectobacterium carotovorum subsp. carotovorum		Solanum Tuberosum	2004	2010	Syria	P. carotovorum		MT684035	MT684182	MT684329	This study
CFBP 7355		C380	Pectobacterium carotovorum subsp. carotovorum		Solanum Tuberosum	2004	2010	Syria	P. carotovorum
CFBP 7357		A17	Pectobacterium carotovorum subsp. brasiliensis		Solanum Tuberosum (Lezita)	2003	2010	Syria	P. brasiliense	SAMN15366440*	MT684036	MT684183	MT684330	This study
CFBP 7358		A45	Pectobacterium carotovorum subsp. brasiliensis		Solanum Tuberosum (Spunta), leaves	2003	2010	Syria	P. brasiliense
CFBP 7359		C18	Pectobacterium carotovorum subsp. brasiliensis		Solanum Tuberosum (Spunta)	2004	2010	Syria	P. brasiliense		MT684037	MT684184	MT684331	This study
CFBP 7360		C317.1	Pectobacterium carotovorum subsp. brasiliensis		Solanum Tuberosum	2004	2010	Syria	P. polaris		MT684038	MT684185	MT684332	This study
CFBP 7362		C137	Pectobacterium carotovorum		Solanum Tuberosum (Draga)	2004	2010	Syria	P. versatile		MK516963	MK517107	MK517251	Portier et al., 2019
CFBP 7364		C142.1s	Pectobacterium carotovorum		Solanum Tuberosum (Spunta)	2004	2010	Syria	P. versatile		MK516964	MK517108	MK517252	Portier et al., 2019
CFBP 7365		C142.2	Pectobacterium carotovorum		Solanum Tuberosum	2004	2010	Syria	P. carotovorum		MT684039	MT684186	MT684333	This study
CFBP 7366		C143	Pectobacterium carotovorum		Solanum Tuberosum	2004	2010	Syria	P. versatile		MK516965	MK517109	MK517253	Portier et al., 2019
CFBP 7367		C144	Pectobacterium carotovorum		Solanum Tuberosum (Spunta)	2004	2010	Syria	P. carotovorum		MT684040	MT684187	MT684334	This study
CFBP 7368		C150	Pectobacterium carotovorum		Solanum Tuberosum (Spunta)	2004	2010	Syria	P. versatile		MK516966	MK517110	MK517254	Portier et al., 2019
CFBP 7369		C267	Pectobacterium carotovorum		Solanum Tuberosum	2004	2010	Syria	P. versatile		MK516967	MK517111	MK517255	Portier et al., 2019
CFBP 7370		C331	Pectobacterium carotovorum		Solanum Tuberosum (Diamant)	2004	2010	Syria	P. actinidiae		MK516968	MK517112	MK517256	Portier et al., 2019
CFBP 7372		C412.4	Pectobacterium carotovorum		Solanum Tuberosum	2004	2010	Syria	P. versatile		MK516969	MK517113	MK517257	Portier et al., 2019
CFBP 7375		M37	Pectobacterium atrosepticum		Solanum tuberosum	2004	2010	Syria	P. atrosepticum		MT684041	MT684188	MT684335	This study
CFBP 797	ATCC 12286, NCPPB 550	Burkholder W.H. SR23	Pectobacterium carotovorum subsp. carotovorum		Nicotiana tabacum	1951	1966	USA	P. sp		MT684042	MT684189	MT684336	This study
CFBP 800			Pectobacterium sp.		Arum sp.	1966	1966	France	P. zantedeschiae		MT684043	MT684190	MT684337	This study
CFBP 8168	LMG2417, NCPPB929, PDDCC1522	Dye EC4, Hayward B493	Pectobacterium aroidearum	Type strain	Zantedeschia aethiopica	1959	2013	South Africa	P. aroidearum		MK516971	MK517115	MK517259	Portier et al., 2019
CFBP 8475	LMG29774	RNS 08-42-1A	P. wasabiae	Type strain	Solanum tuberosum	2008	2016	France	P. parmentieri	SAMN02729843	MK516972	MK517116	MK517260	Portier et al., 2019
CFBP 8476			Pectobacterium carotovorum subsp. brasiliensis		Solanum tuberosum	2013	2016	France	P. brasiliense		MT684044	MT684191	MT684338	This study
CFBP 8536		SCC3193	Pectobacterium parmentieri		Solanum tuberosum	1982	2017	Finland	P. parmentieri	SAMN02604188
CFBP 8537		SCC1	Pectobacterium carotovorum subsp. carotovorum		Solanum tuberosum	1982	2017	Finland	P. versatile	SAMN06621608	MT684045	MT684192	MT684339	This study
CFBP 8603	NCPPB 4611	NIBIO1006	Pectobacterium polaris	Type strain	Solanum tuberosum	2010	2018	Norway	P. polaris	SAMN05853691	MT684046	MT684193	MT684340	This study
CFBP 8604	LMG30622	SS95	Pectobacterium punjabense	Type strain	Solanum tuberosum	2017	2018	Pakistan	P. punjabense	SAMN11162174
CFBP 8625		A97-S13-F16	Pectobacterium peruviense		environment/fresh water	2016	2018	France	P. peruviense	SAMN08798619	MT684047	MT684194	MT684341	This study
CFBP 8626		A350-S18-N16	Pectobacterium peruviense		environment/fresh water	2016	2018	France	P. peruviense	SAMN08798632	MT684048	MT684195	MT684342	This study
CFBP 8629	LMG30744	M022	Pectobacterium fontis	Type strain	fresh water	2013	2018	Malaysia	P. fontis	SAMN03154070
CFBP 8630		s0421	Pectobacterium polaris subsp. parvum	Type strain	Solanum tuberosum	2004	2018	Finland	P. parvum		MT684049	MT684196	MT684343	This study
CFBP 8631		s0416	Pectobacterium polaris subsp. parvum		Solanum tuberosum	2004	2018	Finland	P. parvum		MT684050	MT684197	MT684344	This study
CFBP 8632		A35-S23-M15	Pectobacterium aquaticum		environment/fresh water	2015	2018	France	P. aquaticum	SAMN09259573
CFBP 8633		A101-S19-F16	Pectobacterium aquaticum		environment/fresh water	2016	2018	France	P. aquaticum	SAMN09259574
CFBP 8634		A104-S21-F16	Pectobacterium aquaticum		environment/fresh water	2015	2018	France	P. aquaticum	SAMN09259575
CFBP 8635		A105-S21-F16	Pectobacterium aquaticum		environment/fresh water	2016	2018	France	P. aquaticum	SAMN09259576
CFBP 8636		A127-S21-F16	Pectobacterium aquaticum		environment/fresh water	2015	2018	France	P. aquaticum	SAMN09259577
CFBP 8637	NCPPB 4640	A212-S19-A16	Pectobacterium aquaticum	Type strain	environment/fresh water	2016	2018	France	P. aquaticum	SAMN09259578
CFBP 8651		A67-S18-O15	Pectobacterium versatile		River Water	2015	2018	France	P. versatile	SAMN10417472
CFBP 8652		A69-S13-O15	Pectobacterium versatile		River Water	2015	2018	France	P. versatile	SAMN10417473
CFBP 8653		A75-S21-O15	Pectobacterium versatile		River Water	2015	2018	France	P. versatile	SAMN10417475
CFBP 8654		A165-S18-M16	Pectobacterium versatile		River Water	2016	2018	France	P. versatile		MT747342	MT747344	MT747346	This study
CFBP 8655		A96-S13-F16	Pectobacterium versatile		River Water	2016	2018	France	P. versatile		MT747343	MT747345	MT747347	This study
CFBP 8656		RNS 98-1	Pectobacterium versatile		solanum tuberosum	1998	2018	France	P. versatile		MK516973	MK517117	MK517261	Portier et al., 2019
CFBP 8657		RNS 10-69-3A	Pectobacterium versatile		Solanum tuberosum	2010	2018	France	P. versatile		MK516974	MK517118	MK517262	Portier et al., 2019
CFBP 8658		RNS 15-27-1-1A	Pectobacterium versatile		Solanum tuberosum	2015	2018	France	P. versatile		MK516975	MK517119	MK517263	Portier et al., 2019
CFBP 8659		S4.16.03.3F	Pectobacterium versatile		Solanum tuberosum	2016	2018	Morocco	P. versatile	SAMN10059732
CFBP 8660		S4.16.03.3I	Pectobacterium versatile		Solanum tuberosum	2016	2018	Morocco	P. versatile	SAMN10059734
CFBP 8719		S33	Pectobacterium versatile		rhizosphere of Solanum dulcamara	2017	2019	France	P. versatile
CFBP 8720		S34	Pectobacterium brasiliense		rhizosphere of Solanum dulcamara	2017	2019	France	P. brasiliense
CFBP 8723		A40	Pectobacterium aquaticum		Water	2019	2019	France	P. aquaticum
CFBP 8724		S28	Pectobacterium aquaticum		Water	2018	2019	France	P. aquaticum
CFBP 8739		A644-MVF-S17	P. sp		water	2017	2020	France	P. sp	SAMN15375419*	MT684055	MT684202	MT684349	This study
CFBP 8734		A29-MVF-M15	Pectobacterium carotovorum		water	2015	2020	France	P. carotovorum	SAMN15374769*	MT684051	MT684198	MT684345	This study
CFBP 8735		A122-S21-F16	Pectobacterium odoriferum		water	2016	2020	France	P. odoriferum	SAMN15374999*	MT684052	MT684199	MT684346	This study
CFBP 8736		A143-S20-M16	Pectobacterium brasiliense		water	2016	2020	France	P. sp	SAMN15366227*	MT684053	MT684200	MT684347	This study
CFBP 8737		S21-M15	Pectobacterium aroidearum		water	2015	2020	France	P. aroidearum	SAMN15366232*	MT684054	MT684201	MT684348	This study
